# Supplementary material
Source: publisher figshare collection journal article supplement (https://gsapubs.figshare.com/ndownloader/files/40027246)
Supplement: Supplementary file 1 [file 40027246]

## Sheet: Garnet
					Table 1. Representative EPMA analyses (in wt.%) of garnet and the molecular proportions of its respective end–members.
	Endoskarn															Exoskarn
																Proximal zone														Distal zone
Sample	Maz5-2	MazC	MazH	M3	Maz4	Maz10	Maz11	Maz11-1	Maz11-2	M3-1	MazB	MazB	Mkp9	MazB	M3	Maz6	Maz6-1	Maz6-2	Maz7	Maz9	MazB	M4	MazH	Maz8	Maz8-1	Maz14	Mkp15	Maz18	M7	MazA	MazA-1	MazA-2	MazA-3	MazD	MazD-1	MazD-2	Maz12-1	Sk7–6	Mas8	MA	M2	M1	Mkp15	M7–6	MS7	M2	Maz3
SiO2	36.42	35.91	36.68	36.57	36.59	36.13	36.16	36.04	36.69	36.62	36.12	36.65	36.26	36.34	36.87	37.37	36.49	38.69	37.1	37.1	36.98	37.69	38.16	38.5	38.61	38.16	38.19	38.25	37.57	37.04	36.75	37.75	36.74	36.59	37.13	36.76	36.3	36.96	36.12	36.93	37.01	37.16	37.28	37.06	37.09	37.77	36.9
TiO2	0.54	0.22	0.19	0.26	0.03	0.3	0.12	0.09	0.2	0.08	0.06	0.17	0.29	0.25	0.25	0.48	1.84	0.02	0.6	0.66	0.54	0.42	0.75	0.43	0.84	0.21	0.21	0.31	0.41	0.26	0.33	0.27	0.59	0.69	0.3	0.78	0.29	0.92	1.25	0.27	0.3	0.37	0.36	0.29	0.02	0.09	0.32
Al2O3	5.8	3.43	4.98	5.58	3.83	5.06	2.1	3.64	6.35	3.33	2.2	5.31	5.18	5.01	5.73	11.76	14.99	17.13	14.27	11.28	11.1	12.13	13.66	14.56	16.19	11.08	13.67	11.39	11.16	7.02	7.91	9.8	5.22	5.44	7.93	9.85	6.46	7.99	7.91	8.37	9.37	7.71	7.17	8.47	7.93	8.53	7.53
FeOT*	20.55	23.78	21.44	20.99	23.93	21.74	25.73	24.04	20.37	24.42	25.51	21.45	21.7	22.27	21.36	14.13	4.07	7.67	10.51	14.27	14.5	13.26	11.19	10.33	8.05	14.52	11.59	14.2	13.98	19.45	18.39	15.77	21.89	21.49	18.69	15.89	20	17.61	17.21	17.87	16.92	18.88	19.36	18.12	18.52	18.24	18.96
MnO	0.43	0.36	0.35	0.41	0.42	0.4	0.4	0.46	0.33	0.53	0.41	0.44	0.61	0.73	0.7	0.82	0.34	0.19	3.73	1.12	1.5	0.61	0.77	0.87	0.51	0.59	0.94	0.52	0.54	0.48	0.88	0.43	0.58	0.49	0.86	1.36	0.18	0.51	0.41	0.94	1.03	0.86	0.81	0.89	0.53	0.7	0.84
MgO	0.17	0.12	0.14	0.12	0	0.03	0.01	0.03	0.2	0.03	0.01	0.11	0.06	0.05	0.05	0.04	3.34	0.22	0.03	0.04	0.07	0.25	0.24	0.26	0.37	0.24	0.27	0.2	0.24	0.12	0.04	0.19	0.06	0.07	0.06	0.05	0.01	0.03	0.08	0.08	0.06	0.05	0.05	0.06	0.1	0.03	0.04
CaO	34.16	33.87	34.05	34.13	33.35	33.51	33.26	33.65	34.49	32.89	33.47	33.77	33.63	33.45	33.75	34.78	35.88	36.47	31.86	33.95	33.79	35.04	35.1	35.27	35.87	35	34.93	34.9	35.52	34.05	34.12	35.07	33.39	33.57	33.62	33.54	34.28	34.55	34.62	33.43	33.72	34.02	33.84	33.44	34.4	33.9	33.88
Na2O	0.01	0.01	0	0.01	0	0	0	0.01	0.01	0.01	0.02	0.02	0.02	0	0.01	0.01	0	0	0.01	0	0	0	0	0	0	0.01	0.01	0	0.01	0.02	0.01	0	0.03	0.02	0	0.01	0	0	0	0.01	0.02	0	0	0.02	0.01	0.01	0.01
K2O	0	0	0	0.01	0	0	0	0	0	0	0	0	0	0	0	0	0.01	0	0.01	0	0	0	0.01	0	0.01	0	0	0	0	0	0	0	0	0	0	0	0.01	0	0	0	0	0	0.01	0	0.01	0	0
Total	98.08	97.69	97.84	98.08	98.16	97.17	97.79	97.95	98.64	97.91	97.8	97.92	97.74	98.11	98.72	99.4	97.6	100.39	98.11	98.42	98.48	99.4	99.87	100.22	100.46	99.82	99.8	99.77	99.44	98.45	98.43	99.28	98.5	98.37	98.59	98.24	97.53	98.57	97.6	97.9	98.43	99.06	98.89	98.35	98.6	99.28	98.48
Cations on the basis of 12 oxygen atoms
Si	2.97	2.97	3.01	2.99	3.01	2.99	3.01	2.97	2.97	3.03	3	3	2.98	2.98	2.99	2.95	2.84	2.95	2.95	2.96	2.95	2.96	2.97	2.97	2.96	3	2.97	3	2.96	3	2.97	2.99	3	2.99	3	2.96	2.97	2.98	2.94	2.99	2.98	2.99	3.01	2.99	2.99	3.02	2.98
Al IV	0.03	0.03	0	0.01	0	0.01	0	0.03	0.03	0	0	0	0.02	0.02	0.01	0.05	0.16	0.05	0.05	0.04	0.05	0.04	0.03	0.03	0.04	0	0.03	0	0.04	0	0.03	0.01	0	0.01	0	0.04	0.03	0.02	0.06	0.01	0.02	0.01	0	0.01	0.01	0	0.02
Ti	0.03	0.01	0.01	0.02	0	0.02	0.01	0.01	0.01	0.01	0	0.01	0.02	0.02	0.02	0.03	0.11	0	0.04	0.04	0.03	0.02	0.04	0.03	0.05	0.01	0.01	0.02	0.02	0.02	0.02	0.02	0.04	0.04	0.02	0.05	0.02	0.06	0.08	0.02	0.02	0.02	0.02	0.02	0	0.01	0.02
Al	0.53	0.3	0.48	0.52	0.37	0.48	0.21	0.33	0.57	0.32	0.22	0.51	0.48	0.46	0.54	1.04	1.22	1.49	1.29	1.02	1	1.08	1.22	1.3	1.42	1.02	1.23	1.05	0.99	0.67	0.72	0.91	0.5	0.51	0.75	0.89	0.59	0.74	0.7	0.79	0.86	0.72	0.68	0.8	0.74	0.8	0.7
Fe3+	1.43	1.7	1.48	1.46	1.6	1.5	1.77	1.69	1.43	1.61	1.78	1.46	1.5	1.53	1.43	0.95	0.72	0.56	0.68	0.94	0.98	0.91	0.72	0.67	0.53	0.96	0.78	0.9	1	1.3	1.27	1.07	1.43	1.42	1.22	1.05	1.4	1.17	1.21	1.18	1.13	1.25	1.26	1.18	1.27	1.15	1.28
Fe2+	0	0	0	0	0.04	0.01	0.02	0	0	0.08	0	0	0	0	0.02	0	0	0	0.02	0.02	0	0	0.01	0	0	0	0	0.03	0	0.01	0	0	0.07	0.05	0.04	0.01	0	0.01	0	0.03	0.01	0.01	0.04	0.05	0	0.07	0.01
Mn	0.03	0.03	0.02	0.03	0.03	0.03	0.03	0.03	0.02	0.04	0.03	0.03	0.04	0.05	0.05	0.05	0.02	0.01	0.25	0.08	0.1	0.04	0.05	0.06	0.03	0.04	0.06	0.03	0.04	0.03	0.06	0.03	0.04	0.03	0.06	0.09	0.01	0.04	0.03	0.06	0.07	0.06	0.06	0.06	0.04	0.05	0.06
Mg	0.02	0.01	0.02	0.01	0	0	0	0	0.02	0	0	0.01	0.01	0.01	0.01	0	0.39	0.03	0	0	0.01	0.03	0.03	0.03	0.04	0.03	0.03	0.02	0.03	0.02	0.01	0.02	0.01	0.01	0.01	0.01	0	0	0.01	0.01	0.01	0.01	0.01	0.01	0.01	0	0
Ca	2.99	3	2.99	2.99	2.94	2.97	2.96	2.97	2.99	2.91	2.98	2.96	2.96	2.94	2.94	2.94	3	2.98	2.72	2.9	2.89	2.95	2.93	2.92	2.94	2.94	2.91	2.94	3	2.95	2.95	2.98	2.92	2.94	2.91	2.89	3.01	2.98	3.02	2.9	2.9	2.93	2.92	2.89	2.97	2.9	2.94
Total	8.03	8.06	8.01	8.03	8	8	8	8.03	8.06	8	8.01	8	8.01	8	8	8.02	8.45	8.07	8	8	8.02	8.03	8	8.01	8.02	8	8.02	8	8.08	8	8.03	8.02	8	8	8	8	8.03	8	8.04	8	8	8	8	8	8.03	8	8
Molecular percentages
%Grossular	27.37	16.4	24.12	26.53	18.33	24.23	10.22	17.25	29.6	16.07	10.71	25.37	24.49	23.43	26.82	51.99	63.38	74.17	59.16	50.43	49.09	54.04	60.32	63.71	70.14	50.3	59.94	51.81	50.52	32.98	36.38	45.35	24.58	25.58	36.51	44.16	30.71	37.52	37.1	38.66	42.4	35.42	33.46	38.76	36.85	39.38	34.83
%Andradite	70.41	83.53	74.39	72.15	79.18	73.63	87.7	82.35	70.09	79.73	88.28	72.49	73.43	73.92	70.03	45.41	33.14	25.74	30.17	44.44	46.24	43.57	34.76	32.42	25.63	46.94	37.05	44.46	48.76	64.2	61.47	52.84	69.84	69.25	59.04	49.85	69	58.05	59.26	56.99	53.78	60.85	62.01	56.52	62.44	56.32	61.98
%Almandine+Spessartine	0.98	0.06	0.81	0.95	2.39	1.11	1.64	0.39	0.32	3.83	0.96	1.18	1.42	1.7	2.22	1.84	0.77	0.09	8.98	3.11	3.4	1.35	1.88	1.89	1.11	1.31	2.07	2.07	0.71	1.53	2.02	0.95	3.55	2.78	3.35	3.58	0.29	1.57	0.94	3.22	2.73	2.43	3.25	3.64	1.21	3.88	2.09
%Pyrope	1.24	0	0.69	0	0.11	1.03	0.44	0	0	0.37	0.05	0.96	0.66	0.95	0.94	0.76	2.72	0	1.68	2.03	1.28	1.04	3.04	1.98	3.12	1.45	0.94	1.66	0	1.29	0.13	0.85	2.02	2.38	1.1	2.41	0	2.86	2.71	1.13	1.1	1.3	1.28	1.09	0	0.41	1.1
Note: The chemical compositions of garnets normalized on the basis of 12 oxygen and 8 cations, with estimation of ferric and ferrous iron (Droop 1987)
